# Supplementary material for: The Significance of Systemic Inflammation Markers in Intrahepatic Recurrence of Early-Stage Hepatocellular Carcinoma after Curative Treatment
Source: MDPI journal article supplement (doi:10.3390/cancers14092081), 2022-04-21
Supplement: s1 [file s1]

# Supplementary Material: The Significance of Systemic Inflammation Markers in Intrahepatic Recurrence of Early-Stage Hepatocellular Carcinoma after Curative Treatment

Bong Kyung Bae, Hee Chul Park \*, Gyu Sang Yoo, Moon Seok Choi, Joo Hyun Oh and Jeong Il Yu \*

## Supplemental Material

**Table S1.** Univariable and multivariable cox regression analysis of intrahepatic recurrence free survival for patients who received hepatic resection or RFA as initial treatment.

| Factors                   | Univariable            |                 | Multivariable          |                 |
|---------------------------|------------------------|-----------------|------------------------|-----------------|
|                           | HR (95 % CI)           | <i>p</i> -value | HR (95 % CI)           | <i>p</i> -value |
| Sex (Male)                | 1.207<br>(1.082–1.345) | 0.001           | 1.240<br>(1.108–1.389) | <0.001          |
| Age (>60)                 | 1.071<br>(0.978–1.173) | 0.138           | 1.134<br>(1.033–1.246) | 0.008           |
| Viral status (Viral)      | 1.158<br>(1.016–1.321) | 0.028           |                        |                 |
| AST (>40)                 | 1.590<br>(1.457–1.735) | <0.001          |                        |                 |
| ALT (>40)                 | 1.294<br>(1.184–1.415) | <0.001          |                        |                 |
| ALBI grade (2–3)          | 1.659<br>(1.515–1.818) | <0.001          | 1.211<br>(1.095–1.340) | <0.001          |
| Child-Pugh score (6–9)    | 1.435<br>(1.292–1.594) | <0.001          |                        |                 |
| AFP (>100)                | 1.014<br>(0.917–1.123) | 0.783           |                        |                 |
| <i>n</i> of tumor (2–3)   | 1.704<br>(1.487–1.952) | <0.001          | 1.324<br>(1.146–1.529) | <0.001          |
| Tumor size (>5cm)         | 1.058<br>(0.898–1.246) | 0.502           |                        |                 |
| BCLC stage (A)            | 1.141<br>(1.043–1.249) | 0.004           | 1.158<br>(1.050–1.277) | 0.003           |
| Platelet (≤150,000)       | 1.583<br>(1.445–1.733) | <0.001          | 1.123<br>(1.002–1.259) | 0.046           |
| ANC (≤ 2,500)             | 1.334<br>(1.223–1.455) | <0.001          |                        |                 |
| ALC (>1,200)              | 1.190<br>(1.067–1.327) | 0.002           | 1.147<br>(1.014–1.298) | 0.029           |
| AMC (≤500)                | 1.071<br>(0.970–1.182) | 0.176           | 1.158<br>(1.037–1.292) | 0.009           |
| NLR (>1.0)                | 1.037<br>(0.936–1.149) | 0.487           |                        |                 |
| PLR (≤ 65.0)              | 1.152<br>(1.056–1.257) | 0.002           | 1.162<br>(1.050–1.285) | 0.004           |
| LMR (≤4.0)                | 1.173<br>(0.948–1.312) | 0.155           |                        |                 |
| ALRI (>15.0)              | 1.666<br>(1.504–1.845) | <0.001          | 1.503<br>(1.339–1.688) | <0.001          |
| Change in NLR (>1.1 fold) | 2.395<br>(2.194–2.614) | <0.001          | 1.515<br>(1.358–1.691) | <0.001          |

|                                |                        |        |                        |        |
|--------------------------------|------------------------|--------|------------------------|--------|
| Change in PLR (>1 fold)        | 2.651<br>(2.428–2.895) | <0.001 | 1.964<br>(1.765–2.184) | <0.001 |
| Change in LMR ( $\leq 1$ fold) | 2.237<br>(2.048–2.443) | <0.001 | 1.605<br>(1.452–1.774) | <0.001 |
| Change in ALRI (>1.1 fold)     | 1.191<br>(1.092–1.299) | <0.001 |                        |        |

RFA, radiofrequency ablation; AST, aspartate transaminase; ALT, alanine transferase; ALBI, albumin-bilirubin; AFP, alpha-fetoprotein; *n*, number; BCLC, Barcelona Clinic Liver Cancer; PLT, platelet; ANC, absolute neutrophil count; ALC, absolute lymphocyte count; AMC, absolute monocyte count; NLR, neutrophil-to-lymphocyte ratio; PLR, platelet-to-lymphocyte ratio; LMR, lymphocyte-to-monocyte ratio; ALRI, AST-to-lymphocyte ratio index.

**Table S2.** Univariable and multivariable results of binary logistic regression analysis for potential factors of early and late intrahepatic recurrence for patients who received hepatic resection or RFA as initial treatment.

| Factors                     | Early IHR              |                 |                        |                 | Late IHR               |                 |                        |                 |
|-----------------------------|------------------------|-----------------|------------------------|-----------------|------------------------|-----------------|------------------------|-----------------|
|                             | Univariable            |                 | Multivariable          |                 | Univariable            |                 | Multivariable          |                 |
|                             | OR (95 % CI)           | <i>p</i> -value |
| Sex (Male)                  | 1.357<br>(1.120–1.643) | 0.002           | 1.501<br>(1.213–1.857) | <0.001          | 1.292<br>(1.076–1.551) | 0.006           | 1.499<br>(1.195–1.881) | <0.001          |
| Age (>60)                   | 0.894<br>(0.760–1.051) | 0.174           |                        |                 | 0.883<br>(0.755–1.033) | 0.883           |                        |                 |
| Viral status (Viral)        | 1.435<br>(1.144–1.799) | 0.002           |                        |                 | 1.434<br>(1.153–1.783) | 0.001           |                        |                 |
| AST (>40)                   | 2.190<br>(1.863–2.575) | <0.001          |                        |                 | 1.757<br>(1.500–2.057) | <0.001          |                        |                 |
| ALT (>40)                   | 1.693<br>(1.437–1.994) | <0.001          |                        |                 | 1.499<br>(1.278–1.759) | <0.001          |                        |                 |
| ALBI grade (2–3)            | 2.477<br>(2.079–2.950) | <0.001          | 1.612<br>(1.313–1.979) | <0.001          | 2.075<br>(1.747–2.465) | <0.001          | 1.539<br>(1.233–1.920) | <0.001          |
| Child-Pugh score (6–9)      | 1.765<br>(1.447–2.154) | <0.001          |                        |                 | 1.580<br>(1.298–1.922) | <0.001          |                        |                 |
| AFP (>100)                  | 1.192<br>(0.998–1.423) | 0.052           |                        |                 | 1.185<br>(0.988–1.420) | 0.067           |                        |                 |
| <i>n</i> of tumor (2–3)     | 2.461<br>(1.884–3.215) | <0.001          | 1.713<br>(1.258–2.333) | 0.001           | 1.677<br>(1.267–2.218) | <0.001          |                        |                 |
| Tumor size (>5cm)           | 0.994<br>(0.758–1.303) | 0.965           |                        |                 | 0.867<br>(0.738–1.125) | 0.651           |                        |                 |
| BCLC stage (A)              | 1.294<br>(1.097–1.526) | 0.002           | 1.231<br>(1.019–1.488) | 0.031           | 0.895<br>(0.767–1.045) | 0.160           |                        |                 |
| Platelet ( $\leq 150,000$ ) | 1.983<br>(1.688–2.328) | <0.001          | 1.278<br>(1.039–1.572) | 0.020           | 1.986<br>(1.701–2.320) | <0.001          | 1.296<br>(1.037–1.619) | 0.023           |
| ANC ( $\leq 2,500$ )        | 1.620<br>(1.383–1.897) | <0.001          |                        |                 | 1.469<br>(1.260–1.711) | <0.001          |                        |                 |
| ALC (>1,200)                | 1.214<br>(0.993–1.483) | 0.058           |                        |                 | 0.829<br>(0.682–1.006) | 0.057           | 1.511<br>(1.158–1.972) | 0.002           |
| AMC (>500)                  | 0.979<br>(0.818–1.173) | 0.821           |                        |                 | 1.086<br>(0.915–1.290) | 0.343           |                        |                 |
| NLR (>1.0)                  | 1.025<br>(0.848–1.238) | 0.799           |                        |                 | 0.858<br>(0.718–1.024) | 0.090           |                        |                 |
| PLR ( $\leq 65.0$ )         | 1.206<br>(1.028–1.414) | <0.001          | 1.265<br>(1.035–1.547) | 0.022           | 1.448<br>(1.243–1.688) | <0.001          | 1.421<br>(1.150–1.757) | 0.001           |
| LMR ( $\leq 4.0$ )          | 1.071<br>(0.876–1.310) | 0.504           |                        |                 | 0.993<br>(0.816–1.209) | 0.945           |                        |                 |
| ALRI (<15.0)                | 2.194<br>(1.857–2.592) | <0.001          | 2.266<br>(1.828–2.809) | <0.001          | 1.780<br>(1.488–2.131) | <0.001          | 1.860<br>(1.483–2.333) | <0.001          |
| Change in NLR (>1.1 fold)   | 4.171<br>(3.516–4.947) | <0.001          | 2.274<br>(1.860–2.781) | <0.001          | 3.349<br>(2.837–3.954) | <0.001          | 2.041<br>(1.626–2.563) | <0.001          |

|                                |                        |        |                        |        |                        |        |                        |        |
|--------------------------------|------------------------|--------|------------------------|--------|------------------------|--------|------------------------|--------|
| Change in PLR (>1 fold)        | 4.820<br>(4.069–5.710) | <0.001 | 3.128<br>(2.572–3.806) | <0.001 | 3.978<br>(3.378–4.684) | <0.001 | 2.928<br>(2.367–3.621) | <0.001 |
| Change in LMR ( $\leq$ 1 fold) | 3.563<br>(3.025–4.197) | <0.001 | 2.354<br>(1.946–2.848) | <0.001 | 2.770<br>(2.368–3.241) | <0.001 | 2.290<br>(1.863–2.814) | <0.001 |
| Change in ALRI (>1.1 fold)     | 1.285<br>(1.109–1.489) | 0.001  |                        |        | 1.124<br>(0.954–1.324) | 0.161  |                        |        |

RFA, radiofrequency ablation; AST, aspartate transaminase; ALT, alanine transferase; ALBI, albumin-bilirubin; AFP, alpha-fetoprotein; *n*, number; BCLC, Barcelona Clinic Liver Cancer; ANC, absolute neutrophil count; ALC, absolute lymphocyte count; AMC, absolute monocyte count; NLR, neutrophil-to-lymphocyte ratio; PLR, platelet-to-lymphocyte ratio; LMR, lymphocyte-to-monocyte ratio; ALRI, AST-to-lymphocyte ratio index

**Table S3.** Univariable and multivariable cox regression analysis of intrahepatic recurrence free survival for patients who received hepatic resection as initial treatment.

| Factors                    | Univariable            |                 | Multivariable          |                 |
|----------------------------|------------------------|-----------------|------------------------|-----------------|
|                            | HR (95 % CI)           | <i>p</i> -value | HR (95 % CI)           | <i>p</i> -value |
| Sex (Male)                 | 1.267<br>(1.080–1.485) | 0.004           | 1.232<br>(1.042–1.456) | 0.015           |
| Age (>60)                  | 0.979<br>(0.857–1.118) | 0.752           |                        |                 |
| Viral status (Viral)       | 1.247<br>(1.035–1.503) | 0.020           |                        |                 |
| AST (>40)                  | 1.559<br>(1.376–1.767) | <0.001          |                        |                 |
| ALT (>40)                  | 1.318<br>(1.163–1.494) | <0.001          |                        |                 |
| ALBI grade (2–3)           | 1.378<br>(1.193–1.590) | <0.001          |                        |                 |
| Child-Pugh score (6–9)     | 1.103<br>(0.924–1.316) | 0.279           |                        |                 |
| AFP (>100)                 | 1.044<br>(0.912–1.194) | 0.533           |                        |                 |
| <i>n</i> of tumor (2–3)    | 1.379<br>(1.077–1.767) | 0.011           |                        |                 |
| Tumor size (>5cm)          | 1.252<br>(1.054–1.489) | 0.011           | 1.292<br>(1.072–1.557) | 0.007           |
| BCLC stage (A)             | 1.327<br>(1.140–1.543) | <0.001          | 1.340<br>(1.144–1.570) | <0.001          |
| Platelet ( $\leq$ 150,000) | 1.309<br>(1.158–1.481) | <0.001          |                        |                 |
| ANC ( $\leq$ 2,500)        | 0.921<br>(0.810–1.048) | 0.213           |                        |                 |
| ALC (> 1,200)              | 0.922<br>(0.768–1.106) | 0.380           |                        |                 |
| AMC ( $\leq$ 500)          | 1.094<br>(0.953–1.255) | 0.202           |                        |                 |
| NLR (>1.0)                 | 1.056<br>(0.917–1.216) | 0.450           |                        |                 |
| PLR ( $\leq$ 65.0)         | 1.048<br>(0.922–1.191) | 0.472           |                        |                 |
| LMR ( $\leq$ 4.0)          | 1.318<br>(1.152–1.508) | <0.001          |                        |                 |
| ALRI (>15.0)               | 1.514<br>(1.323–1.732) | <0.001          | 1.506<br>(1.303–1.740) | <0.001          |
| Change in NLR (>1.1 fold)  | 2.633<br>(2.323–2.985) | <0.001          | 1.678<br>(1.431–1.967) | <0.001          |
| Change in PLR (>1 fold)    | 2.950<br>(2.607–3.339) | <0.001          | 2.194<br>(1.892–2.545) | <0.001          |

|                                |                        |        |                        |        |
|--------------------------------|------------------------|--------|------------------------|--------|
| Change in LMR ( $\leq 1$ fold) | 2.542<br>(2.243–2.881) | <0.001 | 1.947<br>(1.683–2.252) | <0.001 |
| Change in ALRI ( $>1.1$ fold)  | 1.182<br>(1.045–1.337) | 0.008  |                        |        |

AST, aspartate transaminase; ALT, alanine transferase; ALBI, albumin-bilirubin; AFP, alpha-feto-protein; *n*, number; BCLC, Barcelona Clinic Liver Cancer; PLT, platelet; ANC, absolute neutrophil count; ALC, absolute lymphocyte count; AMC, absolute monocyte count; NLR, neutrophil-to-lymphocyte ratio; PLR, platelet-to-lymphocyte ratio; LMR, lymphocyte-to-monocyte ratio; ALRI, AST-to-lymphocyte ratio index.

**Table S4.** Univariable and multivariable results of binary logistic regression analysis for potential factors of early and late intrahepatic recurrence for patients who received hepatic resection as initial treatment.

| Factors                      | Early IHR              |                 |                        |                 | Late IHR               |                 |                        |                 |
|------------------------------|------------------------|-----------------|------------------------|-----------------|------------------------|-----------------|------------------------|-----------------|
|                              | Univariable            |                 | Multivariable          |                 | Univariable            |                 | Multivariable          |                 |
|                              | OR (95 % CI)           | <i>p</i> -value |
| Sex (Male)                   | 1.287<br>(1.002–1.652) | 0.048           |                        |                 | 1.324<br>(1.005–1.746) | 0.046           | 1.492<br>(1.087–2.048) | 0.013           |
| Age ( $>60$ )                | 0.784<br>(0.635–0.968) | 0.024           |                        |                 | 0.802<br>(0.637–1.009) | 0.060           |                        |                 |
| Viral status (Viral)         | 1.684<br>(1.252–2.265) | 0.001           | 1.796<br>(1.254–2.573) | 0.001           | 1.363<br>(1.003–1.853) | 0.048           |                        |                 |
| AST ( $>40$ )                | 2.239<br>(1.819–2.755) | <0.001          | 1.573<br>(1.176–2.104) | 0.002           | 1.622<br>(1.289–2.041) | <0.001          |                        |                 |
| ALT ( $>40$ )                | 1.746<br>(1.422–2.144) | <0.001          |                        |                 | 1.515<br>(1.209–1.898) | <0.001          |                        |                 |
| ALBI grade (2–3)             | 1.883<br>(1.467–2.418) | <0.001          |                        |                 | 2.096<br>(1.608–2.733) | <0.001          | 2.162<br>(1.470–3.181) | <0.001          |
| Child-Pugh score (6–9)       | 1.404<br>(1.054–1.870) | 0.020           |                        |                 | 0.902<br>(0.649–1.255) | 0.541           | 1.905<br>(1.189–3.051) | 0.007           |
| AFP ( $>100$ )               | 1.146<br>(0.925–1.419) | 0.213           |                        |                 | 0.881<br>(0.691–1.124) | 0.308           |                        |                 |
| <i>n</i> of tumor (2–3)      | 1.488<br>(0.958–2.311) | 0.077           |                        |                 | 1.763<br>(1.119–2.777) | 0.014           | 1.678<br>(1.009–2.789) | 0.046           |
| Tumor size ( $>5$ cm)        | 1.374<br>(1.046–1.805) | 0.022           | 1.435<br>(1.028–2.003) | 0.034           | 0.882<br>(0.637–1.222) | 0.450           |                        |                 |
| BCLC stage (A)               | 1.696<br>(1.312–2.193) | <0.001          | 1.487<br>(1.100–2.010) | 0.010           | 0.906<br>(0.708–1.159) | 0.432           |                        |                 |
| Platelet ( $\leq 150,000$ )  | 1.445<br>(1.181–1.767) | <0.001          |                        |                 | 1.768<br>(1.421–2.201) | <0.001          |                        |                 |
| ANC ( $\leq 2,500$ )         | 0.829<br>(0.672–1.023) | 0.081           |                        |                 | 0.838<br>(0.666–1.053) | 0.130           |                        |                 |
| ALC ( $>1,200$ )             | 0.854<br>(0.638–1.142) | 0.287           |                        |                 | 1.030<br>(0.738–1.437) | 0.863           |                        |                 |
| AMC ( $>500$ )               | 0.987<br>(0.788–1.236) | 0.910           |                        |                 | 1.154<br>(0.908–1.466) | 0.241           |                        |                 |
| NLR ( $>1.0$ )               | 1.062<br>(0.841–1.342) | 0.612           |                        |                 | 0.810<br>(0.635–1.033) | 0.089           |                        |                 |
| PLR ( $\leq 65.0$ )          | 1.141<br>(0.924–1.409) | 0.221           |                        |                 | 1.272<br>(1.019–1.589) | 0.034           |                        |                 |
| LMR ( $\leq 4.0$ )           | 1.409<br>(1.138–1.745) | 0.002           |                        |                 | 1.161<br>(0.903–1.491) | 0.244           |                        |                 |
| ALRI ( $<15.0$ )             | 1.903<br>(1.536–2.356) | <0.001          | 1.626<br>(1.194–2.214) | 0.002           | 1.662<br>(1.321–2.091) | <0.001          | 1.920<br>(1.444–2.554) | <0.001          |
| Change in NLR ( $>1.1$ fold) | 4.422<br>(3.528–5.527) | <0.001          | 2.402<br>(1.790–3.223) | <0.001          | 2.903<br>(2.273–3.709) | <0.001          | 1.604<br>(1.178–2.184) | 0.003           |
| Change in PLR ( $>1$ fold)   | 4.961<br>(3.980–6.184) | <0.001          | 3.315<br>(2.542–4.322) | <0.001          | 4.133<br>(3.260–4.241) | <0.001          | 3.454<br>(2.592–4.603) | <0.001          |

|                                |                        |        |                        |        |                        |        |                        |        |
|--------------------------------|------------------------|--------|------------------------|--------|------------------------|--------|------------------------|--------|
| Change in LMR ( $\leq 1$ fold) | 3.696<br>(3.002–4.551) | <0.001 | 2.544<br>(1.979–3.270) | <0.001 | 2.799<br>(2.239–3.499) | <0.001 | 2.635<br>(2.000–3.472) | <0.001 |
| Change in ALRI ( $> 1.1$ fold) | 1.225<br>(1.004–1.495) | 0.045  |                        |        | 1.062<br>(0.854–1.321) | 0.590  |                        |        |

AST, aspartate transaminase; ALT, alanine transferase; ALBI, albumin-bilirubin; AFP, alpha-feto-protein; N, number; BCLC, Barcelona Clinic Liver Cancer; ANC, absolute neutrophil count; ALC, absolute lymphocyte count; AMC, absolute monocyte count; NLR, neutrophil-to-lymphocyte ratio; PLR, platelet-to-lymphocyte ratio; LMR, lymphocyte-to-monocyte ratio; ALRI, AST-to-lymphocyte ratio index.

**Table S5.** Univariable and multivariable cox regression analysis of intrahepatic recurrence free survival for patients who received RFA as initial treatment.

| Factors                        | Univariable            |                 | Multivariable          |                 |
|--------------------------------|------------------------|-----------------|------------------------|-----------------|
|                                | HR (95 % CI)           | <i>p</i> -value | HR (95 % CI)           | <i>p</i> -value |
| Sex (Male)                     | 1.215<br>(1.047–1.410) | 0.010           | 1.288<br>(1.102–1.504) | 0.001           |
| Age ( $> 60$ )                 | 1.091<br>(0.962–1.237) | 0.173           | 1.178<br>(1.036–1.340) | 0.013           |
| Viral status (Viral)           | 0.987<br>(0.821–1.186) | 0.886           |                        |                 |
| AST ( $> 40$ )                 | 1.494<br>(1.321–1.690) | <0.001          |                        |                 |
| ALT ( $> 40$ )                 | 1.323<br>(1.165–1.502) | <0.001          |                        |                 |
| ALBI grade (2–3)               | 1.618<br>(1.430–1.831) | <0.001          | 1.289<br>(1.124–1.478) | <0.001          |
| Child-Pugh score (6–9)         | 1.475<br>(1.290–1.688) | <0.001          |                        |                 |
| AFP ( $> 100$ )                | 1.236<br>(1.057–1.445) | 0.008           | 1.198<br>(1.021–1.406) | 0.027           |
| <i>n</i> of tumor (2–3)        | 1.613<br>(1.367–1.904) | <0.001          | 1.299<br>(1.076–1.569) | 0.007           |
| Tumor size ( $> 5$ cm)         | 1.540<br>(0.385–6.169) | 0.542           |                        |                 |
| BCLC stage (A)                 | 1.628<br>(1.439–1.841) | <0.001          | 1.225<br>(1.060–1.415) | 0.006           |
| Platelet ( $\leq 150,000$ )    | 1.422<br>(1.213–1.668) | <0.001          |                        |                 |
| ANC ( $\leq 2,500$ )           | 1.318<br>(1.163–1.495) | <0.001          |                        |                 |
| ALC ( $> 1,200$ )              | 0.968<br>(0.842–1.112) | 0.646           |                        |                 |
| AMC ( $\leq 500$ )             | 1.112<br>(0.964–1.284) | 0.145           |                        |                 |
| NLR ( $> 1.0$ )                | 0.905<br>(0.779–1.052) | 0.195           |                        |                 |
| PLR ( $\leq 65.0$ )            | 1.227<br>(1.085–1.388) | 0.001           |                        |                 |
| LMR ( $\leq 4.0$ )             | 0.906<br>(0.799–1.027) | 0.124           | 1.192<br>(1.038–1.369) | 0.013           |
| ALRI ( $> 15.0$ )              | 1.606<br>(1.368–1.885) | <0.001          | 1.503<br>(1.263–1.787) | <0.001          |
| Change in NLR ( $> 1.1$ fold)  | 1.845<br>(1.630–2.089) | <0.001          | 1.295<br>(1.123–1.494) | <0.001          |
| Change in PLR ( $> 1$ fold)    | 2.019<br>(1.778–2.291) | <0.001          | 1.651<br>(1.428–1.909) | <0.001          |
| Change in LMR ( $\leq 1$ fold) | 1.855<br>(1.639–2.101) | <0.001          | 1.427<br>(1.238–1.645) | <0.001          |

Change in ALRI (>1.1 fold) 1.200  
(1.061–1.357) 0.004

RFA, radiofrequency ablation; AST, aspartate transaminase; ALT, alanine transferase; ALBI, albumin-bilirubin; AFP, alpha-fetoprotein; N, number; BCLC, Barcelona Clinic Liver Cancer; PLT, platelet; ANC, absolute neutrophil count; ALC, absolute lymphocyte count; AMC, absolute monocyte count; NLR, neutrophil-to-lymphocyte ratio; PLR, platelet-to-lymphocyte ratio; LMR, lymphocyte-to-monocyte ratio; ALRI, AST-to-lymphocyte ratio index.

**Table S6.** Univariable and multivariable results of binary logistic regression analysis for potential factors of early and late intrahepatic recurrence for patients who received RFA as initial treatment.

| Factors                 | Early IHR                      |                     |                                  |                     | Late IHR                       |                     |                                  |                     |
|-------------------------|--------------------------------|---------------------|----------------------------------|---------------------|--------------------------------|---------------------|----------------------------------|---------------------|
|                         | Univariable<br>OR (95 %<br>CI) | <i>p</i> -<br>value | Multivariable<br>OR (95 %<br>CI) | <i>p</i> -<br>value | Univariable<br>OR (95 %<br>CI) | <i>p</i> -<br>value | Multivariable<br>OR (95 %<br>CI) | <i>p</i> -<br>value |
| Sex (Male)              | 1.597<br>(1.226–2.080)         | 0.001               | 1.901<br>(1.402–2.579)           | <0.001              | 1.435<br>(1.071–1.922)         | 0.016               | 1.610<br>(1.165–2.227)           | 0.004               |
| Age (>60)               | 0.951<br>(0.755–1.197)         | 0.669               |                                  |                     | 0.816<br>(0.630–1.056)         | 0.123               |                                  |                     |
| Viral status (Viral)    | 0.824<br>(0.596–1.139)         | 0.241               |                                  |                     | 1.361<br>(0.936–1.977)         | 0.106               |                                  |                     |
| AST (>40)               | 1.831<br>(1.450–2.313)         | <0.001              |                                  |                     | 1.553<br>(1.198–2.013)         | 0.001               |                                  |                     |
| ALT (>40)               | 1.723<br>(1.347–2.205)         | <0.001              |                                  |                     | 1.502<br>(1.142–1.977)         | 0.004               |                                  |                     |
| ALBI grade (2–3)        | 2.060<br>(1.624–2.614)         | <0.001              | 1.509<br>(1.128–2.020)           | 0.006               | 1.717<br>(1.318–2.236)         | <0.001              | 1.446<br>(1.051–1.991)           | 0.024               |
| Child-Pugh score (6–9)  | 1.617<br>(1.241–2.106)         | <0.001              |                                  |                     | 1.580<br>(1.180–2.116)         | 0.002               |                                  |                     |
| AFP (>100)              | 1.612<br>(1.184–2.193)         | 0.002               | 1.565<br>(1.106–2.216)           | 0.011               | 1.252<br>(0.880–1.781)         | 0.211               |                                  |                     |
| <i>n</i> of tumor (2–3) | 2.198<br>(1.566–3.085)         | <0.001              | 1.693<br>(1.102–2.600)           | 0.016               | 1.239<br>(0.827–1.858)         | 0.299               |                                  |                     |
| Tumor size (>5cm)       | 1.885<br>(0.170–20.847)        | 0.605               |                                  |                     | -                              | -                   |                                  |                     |
| BCLC stage (A)          | 2.011<br>(1.590–2.542)         | <0.001              | 1.431<br>(1.056–1.941)           | 0.021               | 1.529<br>(1.178–1.985)         | 0.001               |                                  |                     |
| Platelet (≤150,000)     | 1.841<br>(1.390–2.439)         | <0.001              |                                  |                     | 1.446<br>(1.068–1.958)         | 0.017               |                                  |                     |
| ANC (≤2,500)            | 1.673<br>(1.327–2.109)         | <0.001              |                                  |                     | 1.229<br>(0.953–1.585)         | 0.113               | 1.482<br>(1.077–2.038)           | 0.016               |
| ALC (>1,200)            | 1.086<br>(0.838–1.406)         | 0.533               |                                  |                     | 0.961<br>(0.724–1.276)         | 0.784               |                                  |                     |
| AMC (>500)              | 1.074                          | 0.604               |                                  |                     | 1.114                          | 0.477               |                                  |                     |

|                               |                   |        |                        |        |                   |        |                   |        |
|-------------------------------|-------------------|--------|------------------------|--------|-------------------|--------|-------------------|--------|
|                               | (0.821–<br>1.405) |        |                        |        | (0.827–<br>1.500) |        |                   |        |
|                               | 1.325             |        |                        |        | 1.245             |        |                   |        |
| NLR (>1.0)                    | (0.992–<br>1.770) | 0.057  |                        |        | (0.901–<br>1.720) | 0.183  |                   |        |
|                               | 1.497             |        |                        |        | 1.484             |        | 1.546             |        |
| PLR (≤65.0)                   | (1.191–<br>1.882) | 0.001  | 1.584<br>(1.196–2.097) | 0.001  | (1.150–<br>1.915) | 0.002  | (1.142–<br>2.095) | 0.005  |
|                               | 1.076             |        |                        |        | 1.046             |        |                   |        |
| LMR (≤4.0)                    | (0.853–<br>1.357) | 0.539  |                        |        | (0.808–<br>1.355) | 0.731  |                   |        |
|                               | 2.069             |        |                        |        | 1.590             |        | 2.010             |        |
| ALRI (<15.0)                  | (1.564–<br>2.738) | <0.001 | 2.316<br>(1.639–3.271) | <0.001 | (1.177–<br>2.149) | 0.003  | (1.387–<br>2.913) | <0.001 |
|                               | 3.173             |        |                        |        | 2.953             |        | 2.247             |        |
| Change in NLR<br>(>1.1 fold)  | (2.493–<br>4.039) | <0.001 | 2.114<br>(1.578–2.832) | <0.001 | (2.264–<br>3.852) | <0.001 | (1.617–<br>3.120) | <0.001 |
|                               | 3.572             |        |                        |        | 3.069             |        | 2.336             |        |
| Change in PLR<br>(>1 fold)    | (2.810–<br>4.540) | <0.001 | 2.983<br>(2.235–3.980) | <0.001 | (2.358–<br>3.995) | <0.001 | (1.714–<br>3.183) | <0.001 |
|                               | 3.052             |        |                        |        | 2.790             |        | 1.914             |        |
| Change in LMR<br>(≤1 fold)    | (2.403–<br>3.877) | <0.001 | 2.010<br>(1.516–2.665) | <0.001 | (2.143–<br>3.631) | <0.001 | (1.405–<br>2.606) | <0.001 |
|                               | 1.381             |        |                        |        | 1.226             |        |                   |        |
| Change in ALRI<br>(>1.1 fold) | (1.097–<br>1.737) | 0.006  |                        |        | (0.949–<br>1.583) | 0.119  |                   |        |

RFA, radiofrequency ablation; AST, aspartate transaminase; ALT, alanine transferase; ALBI, albumin-bilirubin; AFP, alpha-fetoprotein; N, number; BCLC, Barcelona Clinic Liver Cancer; ANC, absolute neutrophil count; ALC, absolute lymphocyte count; AMC, absolute monocyte count; NLR, neutrophil-to-lymphocyte ratio; PLR, platelet-to-lymphocyte ratio; LMR, lymphocyte-to-monocyte ratio; ALRI, AST-to-lymphocyte ratio index.

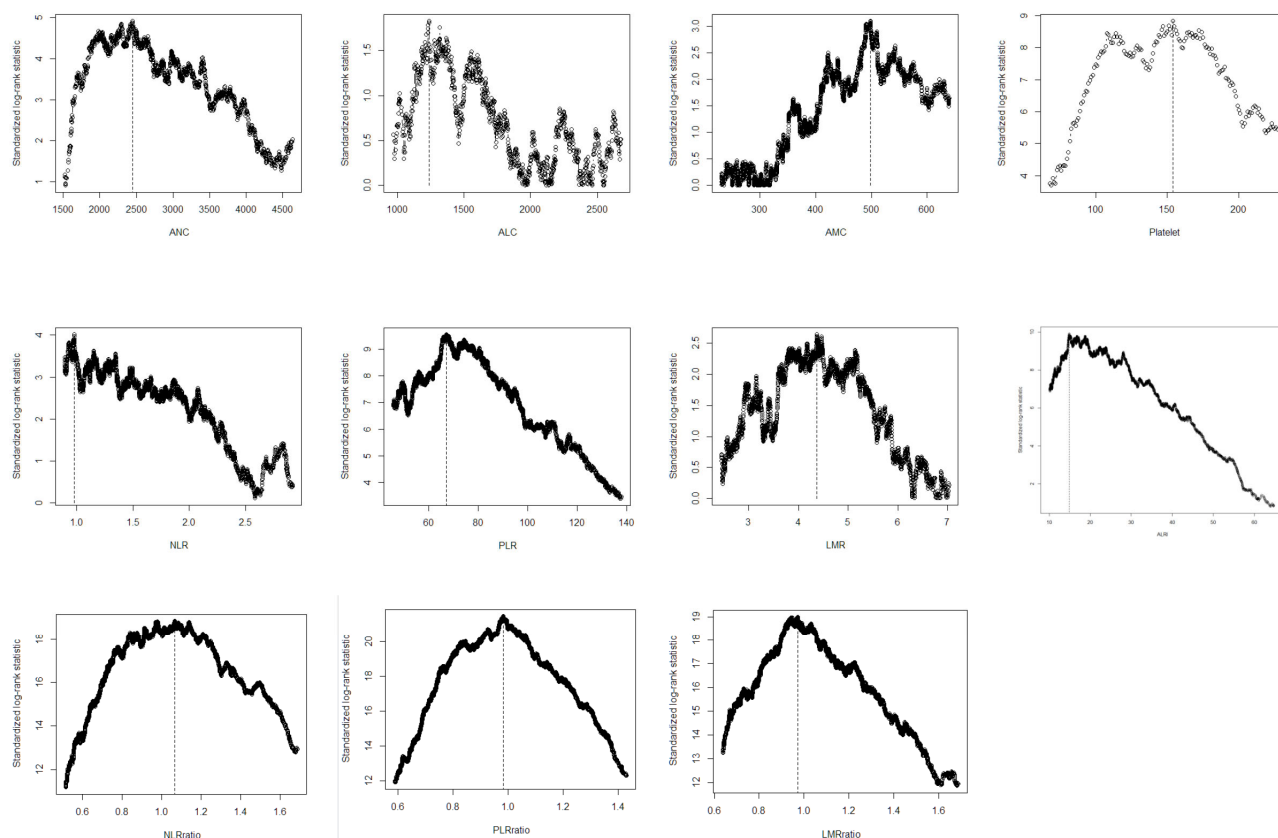

**Figure S1.** Results of maximally selected chi-square statistics to find optimal cut-off value of SIMs

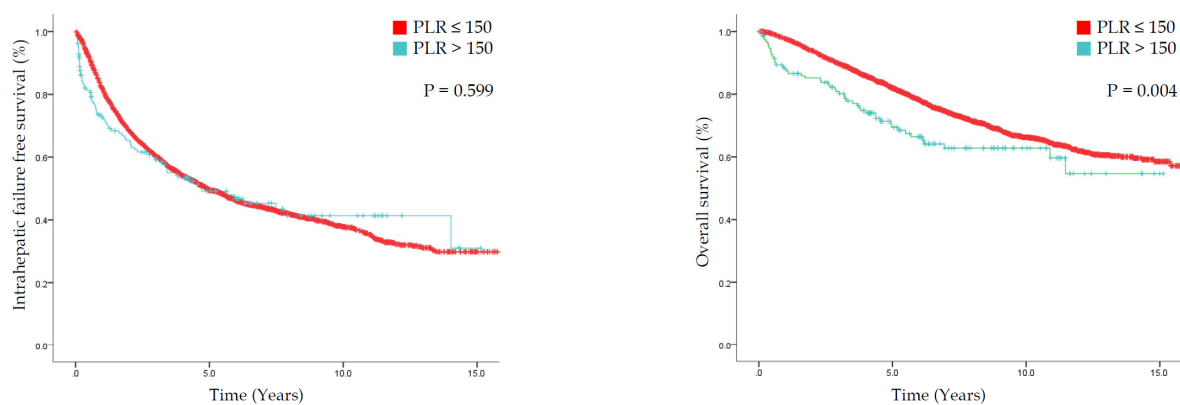

**Figure S2.** IHFFS and OS stratified by PLR 150, which is generally considered significant.
